# Supplementary material for: Intravenous Lidocaine for Refractory Pain in Patients With Pancreatic Ductal Adenocarcinoma and Chronic Pancreatitis: A Multicenter Prospective Nonrandomized Pilot Study
Source: PubMed Central journal article supplement (PMC11421722; doi:10.14309/ctg.0000000000000760), 2024-08-19
Supplement: ct9-15-e1j-s001.pdf [file ct9-15-e1j-s001.pdf]

**Supplementary table 1.** Time points of individual questionnaires

| <b>Questionnaire</b>    | <b>Baseline</b> | <b>1 Day</b> | <b>1 week</b> | <b>1 month</b> | <b>3 months</b> | <b>6 months</b> |
|-------------------------|-----------------|--------------|---------------|----------------|-----------------|-----------------|
| Brief Pain Inventory    | X               | X            | X             | X              | X               | X               |
| Numeric Rating Scale    | X               | X            | X             | X              | X               | X               |
| Izbicki Pain score      | X               | X            | X             | X              | X               | X               |
| Global Perceived Effect |                 | X            | X             | X              | X               | X               |
| Short Form Survey       | X               |              |               | X              | X               | X               |

**Supplementary table 2.** Long term pain scores

| All patients                       | 2 weeks     | Mean difference | Response   | 1 month     | Mean difference | Response   | 3 months    | Mean difference | Response    | 6 months    | Mean difference | Response   |
|------------------------------------|-------------|-----------------|------------|-------------|-----------------|------------|-------------|-----------------|-------------|-------------|-----------------|------------|
|                                    | n=23        |                 |            | n=20        |                 |            | n=18        |                 |             | n=13        |                 |            |
| <b>Brief pain inventory</b>        |             |                 |            |             |                 |            |             |                 |             |             |                 |            |
| Severity of pain (0-10)            | 5.1 (2.6)   | - 0.8 (2.2)     | 8/23 (35%) | 4.1 (2.3)   | - 1.2 (2.1)     | 8/20 (40%) | 4.9 (2.7)   | - 1.0 (2.9)     | 7/18 (39%)  | 4.3 (2.8)   | - 1.2 (2.5)     | 5/13 (38%) |
| Pain interference (0-10)           | 4.8 (2.9)   | - 0.9 (2.7)     | 8/23 (35%) | 4.5 (2.8)   | - 1.0 (2.7)     | 8/20 (40%) | 4.1 (2.9)   | - 1.4 (2.9)     | 11/18 (61%) | 5.1 (3.5)   | - 0.1 (2.7)     | 6/13 (46%) |
| <b>Numeric rating scale</b>        |             |                 |            |             |                 |            |             |                 |             |             |                 |            |
| Average pain (0-10)                | 5.2 (2.8)   | - 1.3 (2.4)     | 7/23 (30%) | 4.9 (2.5)   | - 1.3 (2.7)     | 7/20 (35%) | 4.6 (2.7)   | - 1.7 (2.8)     | 9/18 (50%)  | 4.1 (2.9)   | - 2.1 (2.9)     | 8/13 (62%) |
| Worst pain (0-10)                  | 6.6 (2.9)   | - 1.5 (2.8)     | 7/23 (30%) | 6.1 (2.7)   | - 1.7 (2.8)     | 8/20 (40%) | 5.8 (2.9)   | - 2.1 (3.2)     | 9/18 (50%)  | 6.2 (3.5)   | - 1.8 (3.3)     | 4/13 (31%) |
| <b>Global perceived effect</b>     |             |                 |            |             |                 |            |             |                 |             |             |                 |            |
| Recovery of complaints (1-7)       | 3.9 (1.2)   | NA              | 3/23 (13%) | 3.9 (1.3)   | NA              | 3/20 (15%) | 2.9 (1.6)   | NA              | 9/18 (50%)  | 3.2 (1.5)   | NA              | 5/13 (38%) |
| Treatment satisfaction (1-7)       | 4.0 (1.9)   |                 | 5/23 (22%) | 3.2 (1.3)   |                 | 5/20 (25%) | 3.4 (1.9)   |                 | 6/18 (33%)  | 3.0 (1.2)   |                 | 4/13 (31%) |
| <b>Chronic Pancreatitis</b>        | n=10        |                 |            | n=9         |                 |            | n=8         |                 |             | n=8         |                 |            |
| <b>Brief pain inventory</b>        |             |                 |            |             |                 |            |             |                 |             |             |                 |            |
| Severity of pain (0-10)            | 5.3 (2.5)   | - 0.9 (2.4)     | 4/10 (40%) | 3.6 (2.5)   | - 2.3 (2.2)     | 6/9 (67%)  | 4.1 (3.1)   | - 1.9 (3.2)     | 4/8 (50%)   | 5.2 (2.5)   | - 0.8 (2.3)     | 3/8 (38%)  |
| Pain interference (0-10)           | 5.1 (3.2)   | - 1.1 (2.7)     | 2/10 (20%) | 4.4 (3.5)   | - 1.7 (3.7)     | 5/9 (56%)  | 3.9 (1.3)   | - 1.9 (2.8)     | 5/8 (63%)   | 6.1 (3.3)   | +0.2 (2.3)      | 3/8 (38%)  |
| <b>Numeric rating scale</b>        |             |                 |            |             |                 |            |             |                 |             |             |                 |            |
| Average pain (0-10)                | 5.5 (2.9)   | - 1.5 (2.6)     | 4/10 (40%) | 4.1 (2.5)   | - 2.6 (3.0)     | 6/9 (67%)  | 4.1 (3.0)   | - 2.6 (3.9)     | 5/8 (63%)   | 4.7 (2.9)   | - 2.2 (2.5)     | 5/8 (63%)  |
| Worst pain (0-10)                  | 6.5 (3.3)   | - 2.2 (3.3)     | 4/10 (40%) | 5.2 (3.1)   | - 3.2 (3.2)     | 5/9 (56%)  | 4.4 (3.1)   | - 2.6 (3.9)     | 4/8 (50%)   | 7.4 (2.7)   | - 3.0 (4.0)     | 2/8 (25%)  |
| <b>Izbicki pain score (0-100)*</b> | 72.1 (21.1) | - 3.5 (27.4)    | 2/10 (20%) | 63.2 (21.6) | - 10.9 (16.9)   | 2/8 (25%)  | 55.5 (33.1) | - 20.9 (34.2)   | 2/6 (33%)   | 69.9 (21.3) | - 4.8 (14.3)    | 1/7 (14%)  |
| <b>Global perceived effect</b>     |             |                 |            |             |                 |            |             |                 |             |             |                 |            |
| Recovery of complaints (1-7)       | 3.7 (1.4)   | NA              | 2/10 (20%) | 3.1 (1.1)   | NA              | 2/9 (22%)  | 2.8 (1.4)   | NA              | 4/8 (50%)   | 3.1 (1.6)   | NA              | 4/8 (50%)  |
| Treatment satisfaction (1-7)       | 3.8 (1.9)   |                 | 2/10 (20%) | 2.9 (1.4)   |                 | 3/9 (33%)  | 3.8 (2.1)   |                 | 3/8 (38%)   | 2.9 (1.2)   |                 | 3/8 (38%)  |
| <b>Pancreatic Ductal Adenocarc</b> | n=13        |                 |            | n=11        |                 |            | n=10        |                 |             | n=5         |                 |            |
| <b>Brief pain inventory</b>        |             |                 |            |             |                 |            |             |                 |             |             |                 |            |
| Severity of pain (0-10)            | 5.0 (2.7)   | - 0.7 (2.2)     | 4/13 (31%) | 4.9 (1.9)   | - 0.4 (1.6)     | 2/11 (18%) | 5.5 (2.4)   | - 0.4 (2.8)     | 3/10 (30%)  | 3.1 (3.1)   | - 1.8 (2.9)     | 2/5 (40%)  |
| Pain interference (0-10)           | 4.5 (2.9)   | - 0.8 (2.7)     | 6/13 (46%) | 4.5 (2.3)   | - 0.5 (1.5)     | 3/11 (27%) | 4.3 (3.0)   | - 0.9 (3.0)     | 6/10 (60%)  | 3.6 (3.6)   | - 1.2 (3.8)     | 3/5 (60%)  |
| <b>Numeric rating scale</b>        |             |                 |            |             |                 |            |             |                 |             |             |                 |            |
| Average pain (0-10)                | 4.9 (2.8)   | - 1.1 (2.3)     | 3/13 (23%) | 5.5 (2.4)   | - 0.2 (1.9)     | 1/11 (0%)  | 5.0 (2.4)   | - 1.6 (2.6)     | 4/10 (40%)  | 3.2 (3.3)   | - 2.2 (2.5)     | 3/5 (60%)  |
| Worst pain (0-10)                  | 6.6 (2.8)   | - 1.0 (2.3)     | 3/13 (23%) | 6.8 (2.2)   | - 0.5 (1.9)     | 3/11 (27%) | 6.1 (2.9)   | - 2.2 (3.5)     | 5/10 (50%)  | 4.4 (4.2)   | - 3.0 (4.0)     | 2/5 (40%)  |
| <b>Global perceived effect</b>     |             |                 |            |             |                 |            |             |                 |             |             |                 |            |
| Recovery of complaints (1-7)       | 3.7 (1.4)   | NA              | 3/13 (23%) | 3.1 (1.1)   | NA              | 1/11 (9%)  | 2.8 (1.4)   | NA              | 5/10 (50%)  | 3.1 (1.6)   | NA              | 1/5 (20%)  |
| Treatment satisfaction (1-7)       | 3.8 (1.9)   |                 | 3/13 (23%) | 2.9 (1.4)   |                 | 2/11 (18%) | 3.8 (2.1)   |                 | 3/10 (30%)  | 2.9 (1.2)   |                 | 1/5 (20%)  |

No missing values unless indicated otherwise. Higher scores indicate worse condition. Bold numbers indicate clinical relevant difference. **NA**: not applicable. \*Only in n=10 at 2 weeks, n=8 at 1 month, n=6 at 3 months, and n=7 at 6 months.

**Supplementary table 3.** Long term pain scores in responders to treatment

|                                | Baseline   | 1 day     | Mean difference    | N patients response | 2 weeks    | Mean difference    | N patients response | 1 month    | Mean difference    | N patients response |
|--------------------------------|------------|-----------|--------------------|---------------------|------------|--------------------|---------------------|------------|--------------------|---------------------|
|                                | <i>n=9</i> |           |                    |                     | <i>n=5</i> |                    |                     | <i>n=6</i> |                    |                     |
| <b>Brief pain inventory</b>    |            |           |                    |                     |            |                    |                     |            |                    |                     |
| Severity of pain (0-10)        | 5.5 (1.3)  | 2.9 (1.8) | <b>- 2.6 (0.8)</b> | 9/9 (100%)          | 3.0 (2.8)  | <b>- 2.7 (2.5)</b> | 4/5 (80%)           | 4.2 (1.9)  | <b>- 1.4 (1.8)</b> | 3/6 (50%)           |
| Pain interference (0-10)       | 4.3 (2.2)  | 2.9 (2.3) | <b>- 1.3 (0.9)</b> | 6/9 (67%)           | 3.0 (2.3)  | <b>- 1.6 (2.7)</b> | 3/5 (60%)           | 5.1 (3.3)  | <b>+ 1.0 (2.6)</b> | 1/5 (20%)           |
| <b>Numeric rating scale</b>    |            |           |                    |                     |            |                    |                     |            |                    |                     |
| Average pain (0-10)            | 5.3 (1.6)  | 4.7 (1.9) | <b>- 0.7 (1.5)</b> | 2/9 (22%)           | 3.2 (2.9)  | <b>- 2.4 (3.1)</b> | 3/5 (60%)           | 5.0 (2.2)  | <b>- 0.7 (2.3)</b> | 1/6 (17%)           |
| Worst pain (0-10)              | 7.6 (1.7)  | 6.3 (1.9) | <b>- 1.2 (0.9)</b> | 3/9 (33%)           | 4.4 (2.5)  | <b>- 3.0 (3.1)</b> | 3/5 (60%)           | 5.8 (2.3)  | <b>-1.3 (2.2)</b>  | 3/6 (50%)           |
| <b>Global perceived effect</b> |            |           |                    |                     |            |                    |                     |            |                    |                     |
| Recovery of complaints (1-7)   | NA         | 2.7 (1.0) | NA                 | 4/9 (44%)           | 3.6 (1.5)  | NA                 | 1/5 (20%)           | 3.8 (1.5)  | NA                 | 1/6 (17%)           |
| Treatment satisfaction (1-7)   |            | 2.6 (1.2) |                    | 5/9 (56%)           | 3.4 (1.7)  |                    | 2/5 (40%)           | 2.7 (1.0)  |                    | 2/6 (33%)           |

|                                | 3 months   | Mean difference   | N patients response | 6 months   | Mean difference | N patients response |
|--------------------------------|------------|-------------------|---------------------|------------|-----------------|---------------------|
|                                | <i>n=6</i> |                   |                     | <i>n=4</i> |                 |                     |
| <b>Brief pain inventory</b>    |            |                   |                     |            |                 |                     |
| Severity of pain (0-10)        | 5.8 (2.3)  | + 0.2 (2.8)       | 1/6 (17%)           | 4.1 (2.9)  | - 0.9 (2.4)     | 1/4 (25%)           |
| Pain interference (0-10)       | 4.4 (2.8)  | + 0.5 (3.2)       | 2/6 (33%)           | 5.0 (3.4)  | + 1.9 (3.5)     | 1/4 (25%)           |
| <b>Numeric rating scale</b>    |            |                   |                     |            |                 |                     |
| Average pain (0-10)            | 5.7 (1.6)  | - 0.3 (2.2)       | 1/6 (17%)           | 4.3 (3.1)  | - 0.5 (1.7)     | 1/4 (25%)           |
| Worst pain (0-10)              | 6.7 (1.9)  | <b>-1.3 (3.3)</b> | 3/6 (50%)           | 5.5 (3.9)  | - 1.0 (2.8)     | 1/4 (25%)           |
| <b>Global perceived effect</b> |            |                   |                     |            |                 |                     |
| Recovery of complaints (1-7)   | 3.0 (1.2)  | NA                | 4/6 (67%)           | 4.0 (1.6)  | NA              | 1/4 (25%)           |
| Treatment satisfaction (1-7)   | 3.0 (1.8)  |                   | 3/6 (50%)           | 3.0 (0.8)  |                 | 1/4 (25%)           |

**Supplementary table 4.** Association of invasive treatments and change in medication and response

|                        | 2 weeks<br>(n =21) |         | 1 month<br>(n=20) |         | 3 months<br>(n=18) |         | 6 months<br>(n=13) |         |
|------------------------|--------------------|---------|-------------------|---------|--------------------|---------|--------------------|---------|
|                        | No                 | Yes     | No                | Yes     | No                 | Yes     | No                 | Yes     |
| <b>Less medication</b> | 2 (17%)            | 2 (20%) | 2 (18%)           | 2 (25%) | 2 (18%)            | 4 (67%) | 3 (43%)            | 2 (33%) |
| <b>No change</b>       | 6 (50%)            | 6 (60%) | 7 (64%)           | 3 (38%) | 3 (27%)            | 2 (33%) | 2 (29%)            | 2 (33%) |
| <b>More medication</b> | 4 (33%)            | 2 (20%) | 2 (18%)           | 3 (38%) | 6 (55%)            | 0 (0%)  | 2 (29%)            | 2 (33%) |

|                    | No invasive treatment | Invasive treatment |
|--------------------|-----------------------|--------------------|
| <b>No response</b> | 10 (36%)              | 10 (36%)           |
| <b>Response</b>    | 4 (14%)               | 4 (14%)            |

**Supplementary table 5.** Absolute versus relative difference in pain

| BPI                    | Day one (n=30)      |                      |                           |                           |                            |                            |
|------------------------|---------------------|----------------------|---------------------------|---------------------------|----------------------------|----------------------------|
|                        | Baseline (mean, SD) | 1 day (mean, SD)     | Mean absolute difference^ | Mean relative difference^ | N patients response AD (%) | N patients response RD (%) |
| Severity of pain 0-10  | 5.9 (1.6)           | 4.9 (2.4)            | - 0.8 (1.5)               |                           | 9/29 (31%)                 | 8/29 (28%)                 |
| Pain interference 0-10 | 5.6 (2.4)           | 4.6 (2.5)            | - 0.9 (1.1)               | -16.1%<br>-21.6%          | 10/28 (36%)                | 8/28 (29%)                 |
| BPI                    | Two weeks (n=23)    |                      |                           |                           |                            |                            |
|                        | Baseline (mean, SD) | Two weeks (mean, SD) | Mean absolute difference^ | Mean relative difference^ | N patients response AD (%) | N patients response RD (%) |
| Severity of pain 0-10  | 5.9 (1.6)           | 5.1 (2.6)            | - 0.8 (2.2)               |                           | 8/23 (35%)                 | 7/23 (30%)                 |
| Pain interference 0-10 | 5.6 (2.4)           | 4.8 (2.9)            | - 0.9 (2.2)               | - 11.2%<br>- 12.9%        | 8/23 (35%)                 | 8/23 (40%)                 |
| BPI                    | One month (n=20)    |                      |                           |                           |                            |                            |
|                        | Baseline (mean, SD) | One month (mean, SD) | Mean absolute difference^ | Mean relative difference^ | N patients response AD (%) | N patients response RD (%) |
| Severity of pain 0-10  | 5.9 (1.6)           | 4.1 (2.3)            | - 1.2 (2.1)               |                           | 8/20 (40%)                 | 7/20 (35%)                 |
| Pain interference 0-10 | 5.6 (2.4)           | 4.5 (2.8)            | - 1.0 (2.7)               | - 18.5%<br>- 12.9%        | 8/20 (40%)                 | 8/20 (40%)                 |

| BPI                    | Three months (n=18) |                         |                           |                           |                            |                            |
|------------------------|---------------------|-------------------------|---------------------------|---------------------------|----------------------------|----------------------------|
|                        | Baseline (mean, SD) | Three months (mean, SD) | Mean absolute difference^ | Mean relative difference^ | N patients response AD (%) | N patients response RD (%) |
| Severity of pain 0-10  | 5.9 (1.6)           | 4.9 (2.7)               | -1.0 (2.9)                |                           | 7/18 (39%)                 | 6/18 (33%)                 |
| Pain interference 0-10 | 5.6 (2.4)           | 4.1 (2.9)               | <b>-1.4 (2.9)</b>         | - 9.6%<br>- 15.4%         | 11/18 (61%)                | 9/18 (50%)                 |
| BPI                    | Six months (n=13)   |                         |                           |                           |                            |                            |
|                        | Baseline (mean, SD) | Six months (mean, SD)   | Mean absolute difference^ | Mean relative difference^ | N patients response AD (%) | N patients response RD (%) |
| Severity of pain 0-10  | 5.9 (1.6)           | 4.3 (2.8)               | -1.2 (2.5)                |                           | 5/13 (39%)                 | 5/13 (39%)                 |
| Pain interference 0-10 | 5.6 (2.4)           | 5.1 (3.5)               | -0.1 (2.7)                | - 19.7%<br>+10%           | 6/13 (46%)                 | 5/13 (39%)                 |

**BPI:** brief pain inventory, **AD:** absolute difference,

**RD:** relative difference
